# Supplementary material for: A Paper-Based Device for Ultrasensitive, Colorimetric Phosphate Detection in Seawater
Source: Sensors (Basel). 2020 May 12;20(10):2766. doi: 10.3390/s20102766 (PMC7294414; doi:10.3390/s20102766)
Supplement: Supplementary file 1 [file sensors-20-02766-s001.pdf]

*Electronic Supporting Information for*  
**A Paper-Based Device for Ultrasensitive, Colorimetric Phosphate Detection in  
Seawater**

*Joan M. Racicot, Teresa L. Mako, Alexander Olivelli, and Mindy Levine*

## TABLE OF CONTENTS

|                                          |     |
|------------------------------------------|-----|
| Materials and Methods.....               | S3  |
| Experimental Procedures.....             | S4  |
| Optimization of Device Parameters.....   | S7  |
| Summary of Device Stability Studies..... | S10 |
| Limit of Detection Summary Data.....     | S13 |
| Environmental Stability Studies.....     | S15 |

## **MATERIALS AND METHODS**

All chemicals were purchased from Sigma-Aldrich chemical company or Fisher Scientific chemical company and used as received. Cellulose products were purchased from Fisher Scientific and residual phosphate was removed from the paper by washing it with 1.0 M HCl (3 times) and ultrapure water (3 times) after wax printing but prior to reagent addition. Synthetic freshwater was prepared following EPA standard procedures. Synthetic seawater at a salinity of 30.5 ppt was prepared using Red Sea Coral Pro Salt mix by dissolving 33.4 g of the salt mix in 1 L ultrapure water. Water from the Sargasso Sea, a region with known low nutrient content, was filtered through a 0.2  $\mu\text{m}$  filter to remove organic matter prior to use.

## Experimental Procedure for Device Design

## Experimental Procedure for Image Processing

## Experimental Procedure for Reagent Preparation

The phosphate solutions were prepared from a stock solution of 1000 mg/mL of sodium dihydrogen phosphate in ultrapure water and lower concentrations of 0.1, 0.2, 0.25, 0.3, 0.4, 0.5, 0.6, 0.7, 0.8, 0.9, 1.0, 2.5, 10, and 25 ppm were obtained through serial dilution of the stock solution.

## Experimental Procedure for Device Preparation

Figure 1 consists of two parts. Part (a) is a top-down schematic of a microfluidic chip. It is a rectangular chip with a central vertical channel. The top horizontal section is labeled 'molybdenum reagent loading zone' and has a width of 7 mm. Below this is a narrow vertical section labeled 'ascorbic acid loading zone' with a width of 2 mm. The bottom horizontal section is labeled 'sample loading zone' and 'color analysis zone' and has a width of 5 mm. The total height of the chip is 8.25 mm. The bottom horizontal section has a depth of 4 mm. Part (b) is a 3D perspective view of the chip, showing its thickness and the layout of the loading zones.

S4

The final paper-based devices contained two zones: an ascorbic acid loading zone and molybdenum reagent loading zone (Figure S1). The device was designed in this way to ensure that the two reagents remained fully separated prior to device usage, as combining the two reagents led to undesired reactivity and degradation in less than 24 hours. Ascorbic acid was added to the devices in four separate 3  $\mu$ L aliquots, with the stepwise addition used to ensure that the reagent remained in the loading zone. The devices were allowed to dry for at least 20 minutes between each ascorbic acid addition and prior to use of the device.

### Experimental Procedure for Device Application and Color Analysis

75  $\mu$ L of molybdenum reagent was added to the device via micropipette immediately prior to sample addition and allowed to flow to the ascorbic acid zone. A yellow color was observed when both reagents were allowed to mix, and 25  $\mu$ L of phosphate sample was then applied to the device in the sample loading zone and allowed to develop for 4 minutes before image capture with a cell phone using the settings detailed above.

### Experimental Procedure for Stability Studies

The stability of these devices over time was examined by drying both the molybdenum and ascorbic acid reagent solutions on the devices. The devices were stored in sealed vials and kept in the following conditions: “light” – under ambient lighting and temperature in open air; “dry” – under ambient lighting and temperature with a *Dry & Dry* silica desiccant packet; “dark” – under ambient temperature conditions in darkness; “fridge” – at  $\leq 4$   $^{\circ}$ C in darkness; and “freezer” – at  $\leq -18$   $^{\circ}$ C in darkness. At various time points, samples were scanned with a flatbed scanner and RGB values were obtained using ImageJ software. The degradation of reagents was determined based on the formation of a blue color (indicating the degradation of the molybdenum reagent) or yellow color (indicating the degradation of the ascorbic acid reagent).

### Experimental Procedure for Limit of Detection and Limit of Quantification Analysis

The devices were prepared as discussed above, and each sample point of the calibration curves was tested via three independent experiments to ensure reliability and precision. Solutions of sodium dihydrogen phosphate at concentrations of 0.0, 0.1, 0.2, 0.3, 0.4, 0.5, 0.6, 0.7, 0.8, 0.9, and 1.0 ppm were prepared via serial dilution of concentrated stock solutions made in ultrapure water, synthetic freshwater, synthetic seawater, and Sargasso seawater. 25  $\mu$ L of the sample solution was added to each device and the color was allowed to develop for 4 minutes before image capture with a cell phone. The red values were obtained using ImageJ software and OriginPro nonlinear curve fitting models were applied to the data until the best fitting line (i.e. highest  $R^2$  value) was obtained. Limits of detection (LOD) and limits of quantitation (LOQ) were calculated using the following equations:

$$y_{LOD} = \bar{y}_B + 3\sigma_B \quad (\text{Equation S1})$$

$$y_{LOQ} = \bar{y}_B + 10\sigma_B \quad (\text{Equation S2})$$

where  $y_{LOD}$  and  $y_{LOQ}$  are the signal responses (Red Values) corresponding to LOD and LOQ values,  $\bar{y}_B$  represents the average Red Value of the blank (i.e. 0 ppm phosphate) measurement and  $\sigma_B$  represents the standard deviation of the blank measurement. The  $y_{LOD}$  and  $y_{LOQ}$  values were substituted into the obtained nonlinear best fit equations and Excel Solver (plug-in to Microsoft Excel) was used to solve for the LOD and LOQ concentrations.

### Experimental Procedures for Environmental Robustness Studies

To simulate temperature and humidity ranges, the devices were acclimated at the desired conditions for 30 minutes prior to use. The temperature was controlled in a Boekel Scientific Digital Incubator and relative humidity was adjusted using *Dry & Dry* silica desiccant packets or water as necessary until the desired relative humidity was reached. Temperature and relative humidity were monitored using an AcuRite Digital Humidity and Temperature Comfort Monitor. Once acclimation was complete, the phosphate sample was

added to the devices and the devices were returned to the incubator and the color was allowed to develop for 4 minutes before images were collected.

To simulate turbidity conditions, suspensions of 1 mg/mL, 5 mg/mL, and 10 mg/mL of Kaolin clay in phosphate sample solutions (0, 0.5, 2.5, 5 ppm) were created, then allowed to stir vigorously overnight.

## OPTIMIZATION OF DEVICE PARAMETERS

### Optimization of Paper Type

A variety of filter paper types were studied for colorimetric responses to the presence of phosphate, and the results are summarized in Figure S2 and Table S1, below:

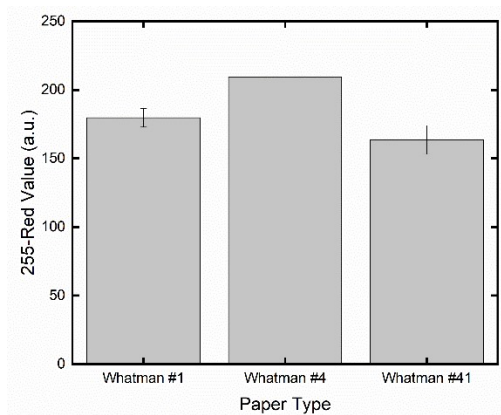

**Figure S2.** Illustration of the colorimetric responses of Whatman #1, Whatman #4, and Whatman #41 functionalized papers to the presence of phosphate, by measuring changes in the value of 255-red value after exposure of the functionalized paper to phosphate anion

**Table S1.** Quantitative changes in the color of functionalized filter papers after exposure to phosphate anion<sup>a</sup>

| Filter paper type | Colorimetric response measured as 255-red value (a.u.) |
|-------------------|--------------------------------------------------------|
| Whatman #1        | 179.7 ± 6.8                                            |
| Whatman #4        | 209.6 ± 5.7                                            |
| Whatman #41       | 163.6 ± 10.4                                           |

<sup>a</sup> All results represent an average of at least three trials

### Optimization of Additives

A variety of polyol additives were tested for their ability to stabilize the molybdenum reagent, and the results are summarized in Figure S3 and Table S2, below:

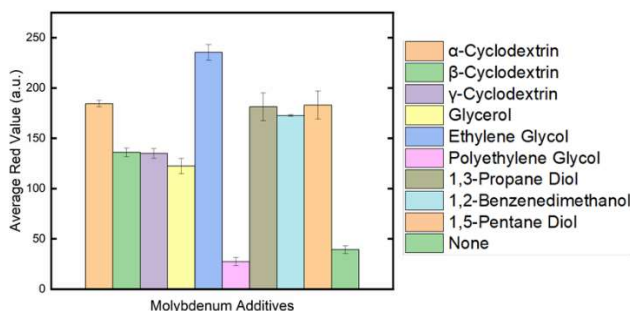

**Figure S3.** Illustration of the effects of polyol additives on the stability of the molybdenum reagent used for phosphate detection, measured as a function of the average red value (a.u.)

**Table S2.** Effects of polyol additives on the stability of the molybdenum reagent used<sup>a</sup>

| Additive | Average red value (a.u.) |
|----------|--------------------------|
|----------|--------------------------|

|                        |              |
|------------------------|--------------|
| None                   | 39.3 ± 3.8   |
| $\alpha$ -Cyclodextrin | 184.5 ± 3.2  |
| $\beta$ -Cyclodextrin  | 136.0 ± 4.3  |
| $\gamma$ -Cyclodextrin | 135.0 ± 4.8  |
| Glycerol               | 122.3 ± 7.6  |
| Ethylene glycol        | 235.5 ± 7.8  |
| Polyethylene glycol    | 27.4 ± 3.9   |
| 1,3-Propane diol       | 181.3 ± 13.8 |
| 1,2-Benzenedimethanol  | 172.6 ± 0.8  |
| 1,5-Pentane diol       | 183.1 ± 14.0 |

a All results represent an average of at least three trials

### Optimization of Ethylene Glycol Ratio

A variety of ratios of ethylene glycol to the active molybdenum reagent were tested, with the goal of identifying the ratio that enabled maximum reagent stabilization. The results of these studies are summarized in Figure S4 and Table S3, below:

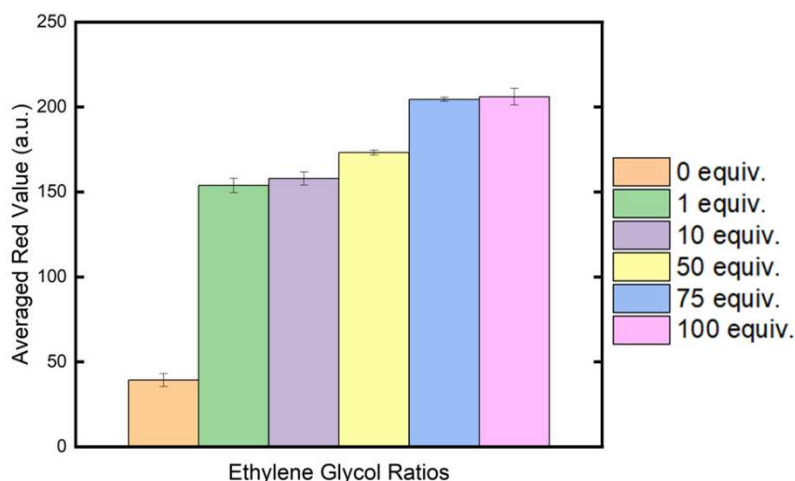

**Figure S4.** Illustration of how different molar ratios of ethylene glycol (relative to the molybdenum complex) result in changes in the stability of the molybdenum reagent, with higher average red values (a.u.) indicating higher stability. Ratios of ethylene glycol were measured at: 0 molar equivalents, 1 molar equivalent, 10 molar equivalents, 50 molar equivalents, 75 molar equivalents, and 100 molar equivalents, and the results represent an average of at least three trials.

**Table S3.** Effects of molar equivalents of ethylene glycol added on the stability of the molybdenum reagent used, measured by the average red value<sup>a</sup>

| Equivalents of ethylene glycol | Average red value (a.u.) |
|--------------------------------|--------------------------|
| 0                              | 39.3 ± 3.8               |
| 1                              | 153.8 ± 4.2              |
| 10                             | 157.9 ± 3.9              |

|     |                 |
|-----|-----------------|
| 50  | $173.1 \pm 1.4$ |
| 75  | $204.5 \pm 1.2$ |
| 100 | $206.0 \pm 4.9$ |

a All results represent an average of at least three trials

### Optimization of Exposure Time to Phosphate

The amount of time to expose the functionalized device to phosphate was measured, using phosphate concentrations of 0 ppm, 0.25 ppm, 2.5 ppm, and 25 ppm, and the coloration of the device after exposure to these concentrations was measured in one-minute intervals up to six minutes. The results of these optimization trials are summarized in Figure S5 and Table S4, below:

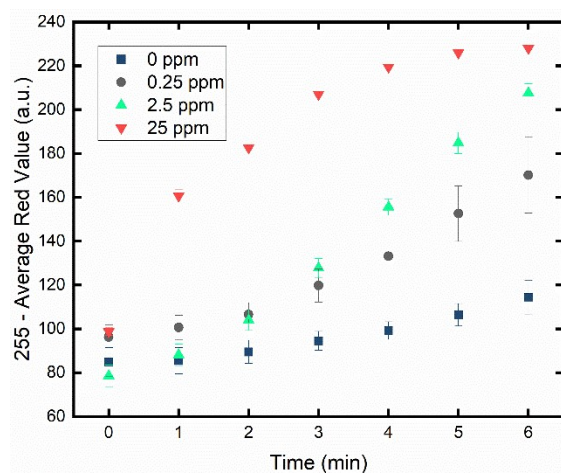

**Figure S5.** Summary data on the effects of exposure time on the colorimetric response of the device to phosphate concentrations of 0 ppm, 0.25 ppm, 2.5 ppm, and 25 ppm. Results were calculated using image processing software (ImageJ) and represent an average of at least three trials.

**Table S4.** Effects of exposure time on the colorimetric response of the device to phosphate concentrations of 0 ppm, 0.25 ppm, 2.5 ppm, and 25 ppm<sup>a</sup>

| Exposure time (minutes) | Colorimetric response (255-average red value) (a.u.) |                    |                   |                  |
|-------------------------|------------------------------------------------------|--------------------|-------------------|------------------|
|                         | 0 ppm phosphate                                      | 0.25 ppm phosphate | 2.5 ppm phosphate | 25 ppm phosphate |
| 0                       | $84.9 \pm 6.5$                                       | $96.2 \pm 5.4$     | $78.5 \pm 4.9$    | $98.8 \pm 1.8$   |
| 1                       | $85.4 \pm 6.0$                                       | $100.6 \pm 5.6$    | $88.1 \pm 4.9$    | $160.6 \pm 2.9$  |
| 2                       | $89.5 \pm 5.3$                                       | $106.5 \pm 5.3$    | $104.0 \pm 4.8$   | $182.6 \pm 1.3$  |
| 3                       | $94.5 \pm 4.3$                                       | $119.7 \pm 7.6$    | $127.8 \pm 4.3$   | $206.9 \pm 1.3$  |
| 4                       | $99.2 \pm 4.0$                                       | $133.1 \pm 1.4$    | $155.6 \pm 3.7$   | $219.4 \pm 0.5$  |
| 5                       | $106.4 \pm 5.1$                                      | $152.6 \pm 12.7$   | $184.8 \pm 4.8$   | $225.9 \pm 0.9$  |
| 6                       | $114.4 \pm 7.8$                                      | $170.1 \pm 17.3$   | $207.5 \pm 4.4$   | $228.1 \pm 0.9$  |

a All results represent an average of at least three trials.

## SUMMARY OF DEVICE STABILITY STUDIES

The stability of the optimized device was measured under a variety of conditions, including temperature variations, exposure to/ protection from light, and with or without protection from ambient moisture. The results of these studies are summarized in the graphs and tables shown below:

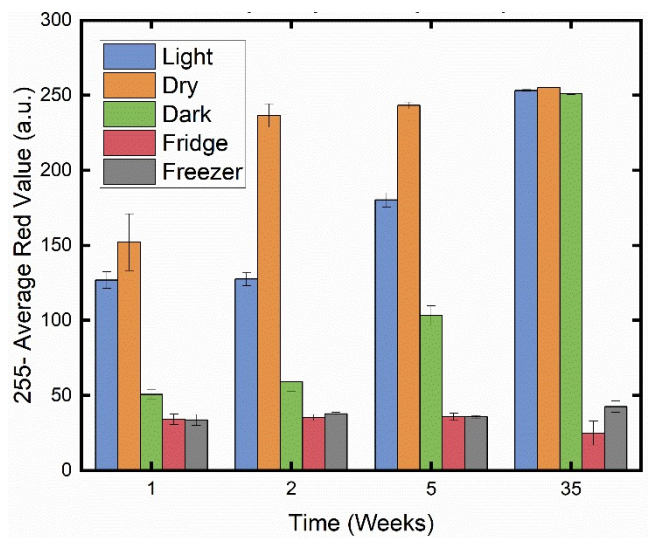

**Figure S6.** Summary of the stability studies of the optimized device in the presence of ethylene glycol as an additive, measured through changes in the average red value of the functionalized paper device.

**Table S5.** Quantitative measurements of the coloration of the device in the presence of ethylene glycol when stored under ambient light (light), with a desiccant package (dry), wrapped in foil (dark), in the refrigerator (fridge), and in the freezer (freezer)<sup>a</sup>

| Time (weeks) | Colorimetric response (255-average red value) (a.u.) |              |             |            |            |
|--------------|------------------------------------------------------|--------------|-------------|------------|------------|
|              | Light                                                | Dry          | Dark        | Fridge     | Freezer    |
| 1            | 126.9 ± 5.6                                          | 152.1 ± 18.9 | 50.6 ± 3.4  | 34.1 ± 3.5 | 33.7 ± 3.5 |
| 2            | 127.5 ± 4.4                                          | 236.5 ± 7.8  | 59.2 ± 6.6  | 35.3 ± 2.0 | 37.8 ± 1.0 |
| 5            | 180.3 ± 4.8                                          | 243.2 ± 2.3  | 103.2 ± 6.5 | 35.7 ± 2.4 | 35.7 ± 0.9 |
| 35           | 253.2 ± 0.6                                          | 255.0 ± 0.0  | 250.9 ± 0.4 | 25.0 ± 8.0 | 42.6 ± 3.8 |

<sup>a</sup> All values represent an average of at least three trials and were obtained using ImageJ software for data analysis and quantification.

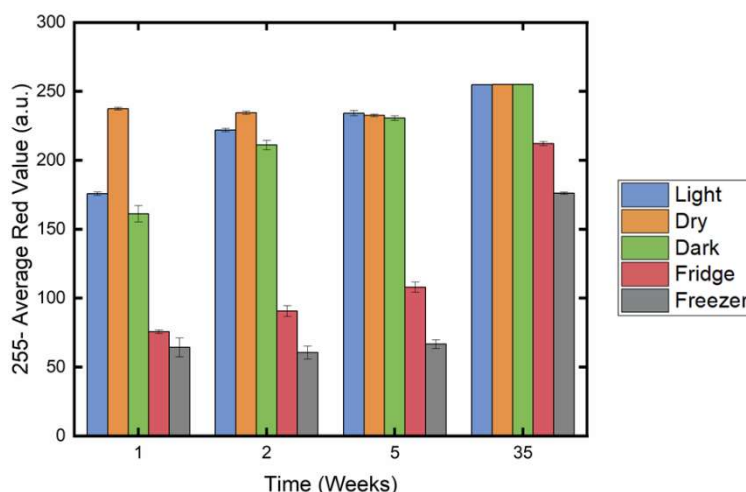

**Figure S7.** Summary of the stability studies of the optimized device in the absence of ethylene glycol as an additive, measured through changes in the average red value of the functionalized paper device.

**Table S6.** Quantitative measurements of the coloration of the device in the absence of ethylene glycol when stored under ambient light (light), with a desiccant package (dry), wrapped in foil (dark), in the refrigerator (fridge), and in the freezer (freezer)<sup>a</sup>

| Time (weeks) | Colorimetric response (255-average red value) (a.u.) |             |             |             |             |
|--------------|------------------------------------------------------|-------------|-------------|-------------|-------------|
|              | Light                                                | Dry         | Dark        | Fridge      | Freezer     |
| 1            | 175.8 ± 1.2                                          | 237.3 ± 1.0 | 161.2 ± 5.9 | 75.6 ± 1.2  | 64.2 ± 6.9  |
| 2            | 221.9 ± 1.2                                          | 234.5 ± 1.2 | 211.1 ± 3.4 | 90.5 ± 3.9  | 60.5 ± 4.6  |
| 5            | 234.1 ± 1.9                                          | 232.5 ± 0.9 | 230.6 ± 1.7 | 107.9 ± 3.8 | 66.6 ± 3.1  |
| 35           | 254.9 ± 0.0                                          | 255.0 ± 0.0 | 255.0 ± 0.1 | 212.1 ± 1.6 | 176.1 ± 0.8 |

<sup>a</sup> All values represent an average of at least three trials and were obtained using ImageJ software for data analysis and quantification.

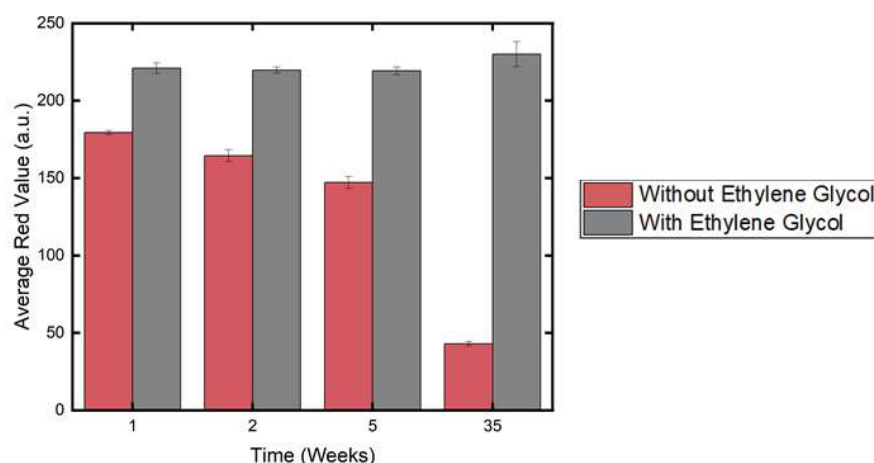

**Figure S8.** Summary of stability studies of the optimized device when stored in the refrigerator with and without ethylene glycol as a stabilizing agent

**Table S7.** Quantitative measurements of the coloration of the device when stored in the refrigerator with and without ethylene glycol as a stabilizing agent<sup>a</sup>

| Time (weeks) | Average Red Value (a.u.) without Ethylene Glycol | Average Red Value (a.u.) with Ethylene Glycol |
|--------------|--------------------------------------------------|-----------------------------------------------|
| 1            | 179.4 ± 1.2                                      | 220.9 ± 3.5                                   |
| 2            | 164.5 ± 3.9                                      | 219.7 ± 2.0                                   |
| 5            | 147.1 ± 3.8                                      | 219.3 ± 2.4                                   |
| 35           | 42.9 ± 1.6                                       | 230.0 ± 8.0                                   |

<sup>a</sup> All values represent an average of at least three trials and were obtained using ImageJ software for data analysis and quantification.

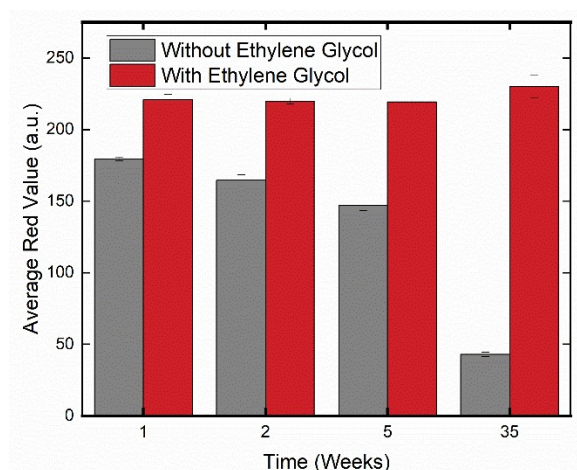

**Figure S9.** Summary of stability studies of the optimized device when stored in the freezer with and without ethylene glycol as a stabilizing agent

**Table S8.** Quantitative measurements of the coloration of the device when stored in the freezer with and without ethylene glycol as a stabilizing agent

| Time (weeks) | Average Red Value (a.u.) without Ethylene Glycol | Average Red Value (a.u.) with Ethylene Glycol |
|--------------|--------------------------------------------------|-----------------------------------------------|
| 1            | 64.2 ± 6.9                                       | 33.7 ± 3.5                                    |
| 2            | 60.5 ± 4.6                                       | 37.8 ± 1.0                                    |
| 5            | 66.6 ± 3.1                                       | 35.7 ± 0.9                                    |
| 35           | 176.1 ± 0.8                                      | 42.6 ± 3.8                                    |

<sup>a</sup> All values represent an average of at least three trials and were obtained using ImageJ software for data analysis and quantification.

## LIMIT OF DETECTION SUMMARY DATA

Limits of detection were calculated for the optimized device in ultrapure water, synthetic freshwater, synthetic seawater, and Sargasso seawater, and results of these studies are summarized in the figures and tables below:

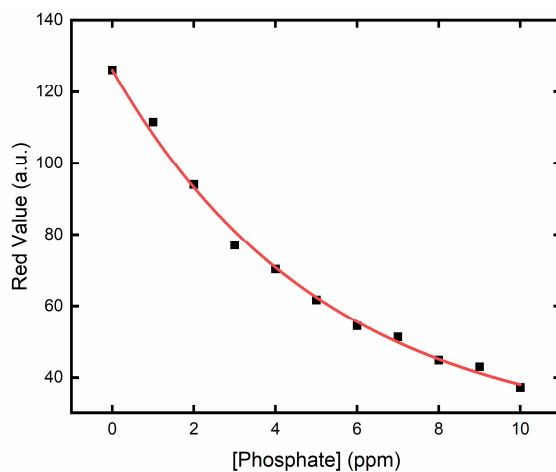

**Figure S10.** Limit of detection of phosphate in ultrapure water, with the non-linear best fit function shown in red. Equation:  $y = A_1 \cdot \exp(-x/t_1) + y_0$ , where  $y_0 = 22.8$ ;  $A_1 = 103.3$ ;  $t_1 = 5.2$ .  $R^2 = 0.99$

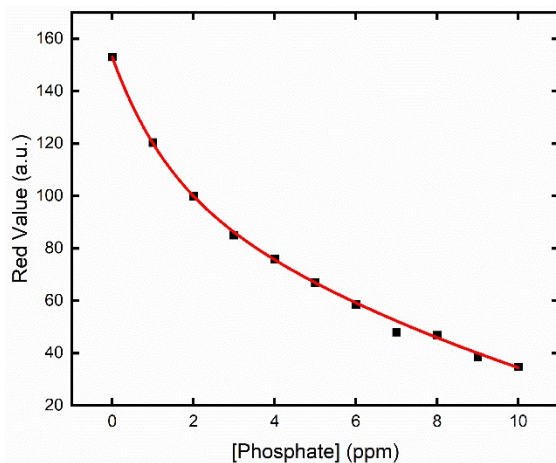

**Figure S11.** Limit of detection of phosphate in synthetic freshwater, with the non-linear best fit function shown in red. Equation:  $y = A_1 \cdot \exp(-x/t_1) + A_2 \cdot \exp(-x/t_2) + y_0$ , where  $A_1 = 44.0$ ;  $t_1 = 1.34$ ;  $A_2 = 158.$ ;  $t_2 = 15.7$ ;  $y_0 = -49.0$ .  $R^2 = 0.999$ .

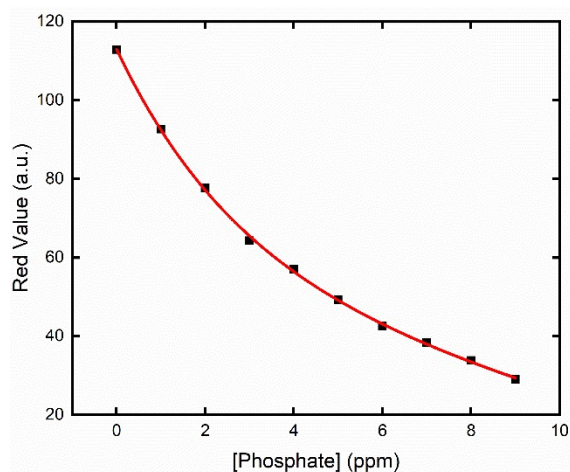

**Figure S12.** Limit of detection of phosphate in synthetic seawater, with the non-linear best fit function shown in red. Equation:  $y = A1 \cdot \exp(-x/t1) + A2 \cdot \exp(-x/t2) + y0$ , where  $y0 = -661299$ ;  $A1 = 58.6$ ;  $t1 = 2.8$ ;  $A2 = 661353.1$ ;  $t2 = 216917.9$ ;  $R^2 = 0.999$ .

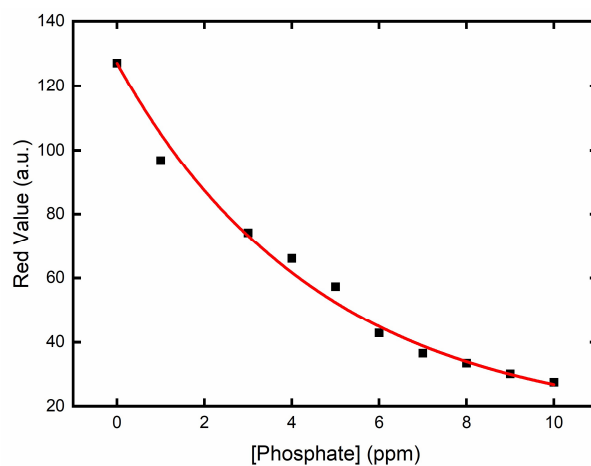

**Figure S13.** Limit of detection of phosphate in Sargasso seawater, with the non-linear best fit function shown in red. Equation:  $y = y0 + A1 \cdot \exp(-(x-x0)/t1) + A2 \cdot \exp(-(x-x0)/t2)$ ;  $y0 = 13.8$ ;  $x0 = -0.00426$ ;  $A1 = 56.1$ ;  $t1 = 4.6$ ;  $A2 = 57.4$ ;  $t2 = 4.6$ .  $R^2 = 0.999$ .

**Table S9.** Summary of limit of detection and limit of quantification values of phosphate obtained using the optimized device in a variety of aqueous media

| Aqueous Media        | Limit of Detection (ppm) | Limit of Quantification (ppm) |
|----------------------|--------------------------|-------------------------------|
| Ultrapure water      | 0.16                     | 0.56                          |
| Synthetic freshwater | 0.13                     | 0.46                          |
| Synthetic seawater   | 0.23                     | 0.82                          |
| Sargasso seawater    | 0.28                     | 0.99                          |

## ENVIRONMENTAL STABILITY STUDIES

The optimized device was tested under a variety of conditions, including variable humidity values, temperatures, and turbidities, and the results are summarized in the figures and tables below.

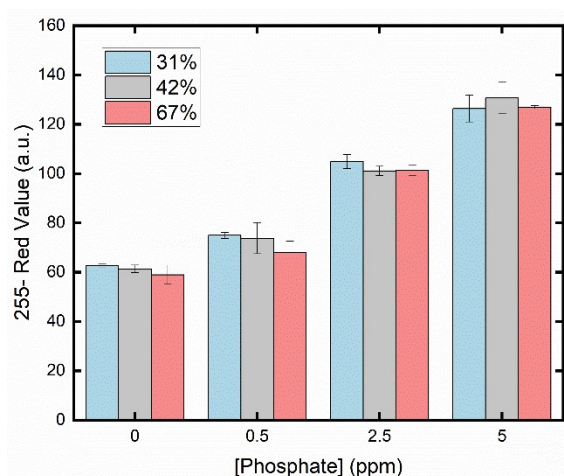

**Figure S14.** Coloration of the optimized device after exposure to phosphate (0 ppm, 0.5 ppm, 2.5 ppm, and 5 ppm) in the presence of various humidity values (31%, 42%, and 67%), measured by changes in the red value of the device

**Table S10.** Quantitative values for coloration of the optimized device at various concentrations of phosphate in the presence of variable humidity values<sup>a</sup>

| [Phosphate] (ppm) | 255-Red Value (a.u.)<br>at 31% humidity | 255-Red Value (a.u.)<br>at 42% humidity | 255-Red Value (a.u.)<br>at 67% humidity |
|-------------------|-----------------------------------------|-----------------------------------------|-----------------------------------------|
| 0                 | 62.6 ± 0.8                              | 61.3 ± 1.6                              | 58.9 ± 3.8                              |
| 0.5               | 74.9 ± 1.2                              | 73.8 ± 6.3                              | 67.9 ± 4.7                              |
| 2.5               | 104.8 ± 2.9                             | 101.1 ± 1.9                             | 101.2 ± 2.1                             |
| 5                 | 126.3 ± 5.5                             | 130.8 ± 6.3                             | 126.9 ± 0.6                             |

<sup>a</sup> All results represent an average of at least three trials

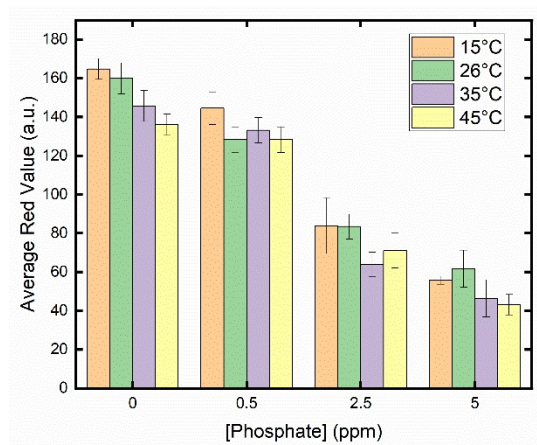

**Figure S15.** Coloration of the optimized device after exposure to phosphate (0 ppm, 0.5 ppm, 2.5 ppm, and 5 ppm) at various temperatures (15 °C, 26 °C, 35 °C, and 45 °C), measured by changes in the red value of the device

**Table S11.** Quantitative values for coloration of the optimized device at various concentrations of phosphate at a variety of temperatures<sup>a</sup>

| [Phosphate] (ppm) | Average Red Value at 15 °C | Average Red Value at 26 °C | Average Red Value at 35 °C | Average Red Value at 45 °C |
|-------------------|----------------------------|----------------------------|----------------------------|----------------------------|
| 0                 | 164.8 ± 5.3                | 160.0 ± 8.0                | 145.7 ± 8.0                | 136.0 ± 5.5                |
| 0.5               | 144.5 ± 8.4                | 128.3 ± 6.5                | 133.1 ± 6.5                | 128.3 ± 6.6                |
| 2.5               | 83.9 ± 14.4                | 83.5 ± 6.4                 | 63.9 ± 6.4                 | 71.0 ± 9.0                 |
| 5                 | 55.7 ± 2.1                 | 61.7 ± 9.6                 | 46.4 ± 9.6                 | 43.1 ± 5.3                 |

<sup>a</sup> All results represent an average of at least three trials

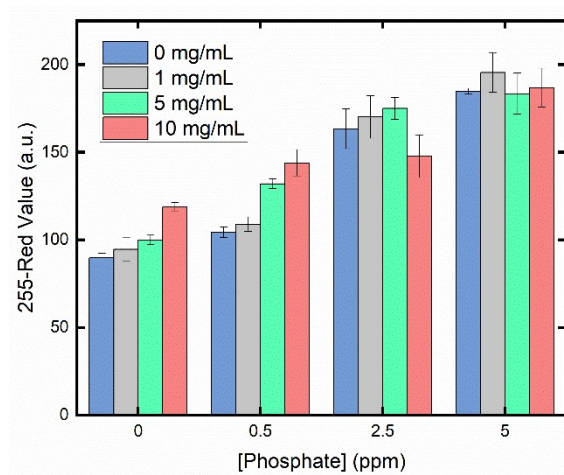

**Figure S16.** Coloration of the optimized device after exposure to phosphate (0 ppm, 0.5 ppm, 2.5 ppm, and 5 ppm) at various turbidity values (0 mg/mL, 1 mg/mL, 5 mg/mL, 10 mg/mL), measured by changes in the red value of the device

**Table S12.** Quantitative values for coloration of the optimized device at various concentrations of phosphate at a variety of turbidity values<sup>a</sup>

| [Phosphate] (ppm) | 255-Red Value at 0 mg/mL | 255-Red Value at 1 mg/mL | 255-Red Value at 5 mg/mL | 255-Red Value at 10 mg/mL |
|-------------------|--------------------------|--------------------------|--------------------------|---------------------------|
| 0                 | 89.6 ± 2.6               | 94.5 ± 6.8               | 99.9 ± 2.7               | 118.9 ± 2.4               |
| 0.5               | 104.3 ± 3.0              | 108.9 ± 4.1              | 132.0 ± 2.7              | 143.9 ± 7.5               |
| 2.5               | 163.4 ± 11.3             | 170.1 ± 12.1             | 175.0 ± 6.3              | 147.7 ± 12.2              |
| 5                 | 184.8 ± 1.7              | 195.4 ± 11.3             | 183.4 ± 11.7             | 186.8 ± 11.1              |

<sup>a</sup> All results represent an average of at least three trials
